# Supplementary material for: A Black Hole Eddy dataset of North Pacific Ocean based on satellite altimetry
Source: Copernicus journal article supplement (doi:10.5194/essd-17-7119-2025), 2025-12-12
Supplement: Supplementary file [file essd-17-7119-2025-supplement-title-page.pdf › essd-17-7119-2025-supplement-title-page.pdf]

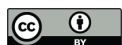

*Supplement of*

## **A Black Hole Eddy dataset of North Pacific Ocean based on satellite altimetry**

**Fenglin Tian et al.**

*Correspondence to:* Ge Chen (gechen@ouc.edu.cn)

- [essd-17-7119-2025-supplement-title-page.pdf](#)
- [Video\\_supplement](#)
  - [S1.Comparison of the coherence between Eulerian Eddy, RCLVs and Black Hole Eddy.mp4](#)
  - [S2. Analysis of the coherence of Naked Black Hole Eddy.mp4](#)

The copyright of individual parts of the supplement might differ from the article licence.
